# Supplementary material for: A simple molecular design for tunable two-dimensional imine covalent organic frameworks for optoelectronic applications
Source: Royal Society of Chemistry journal article supplement (doi:10.1039/d0cp02961k), 2020-01-01
Supplement: d0cp02961k1.pdf [file d0cp02961k1.pdf]

**Electronic Supplementary Information (ESI)**

**A Simple Molecular Design for Tunable Two-Dimensional Imine Covalent Organic Frameworks for Optoelectronic Applications**

Vivek K. Yadav<sup>[a]</sup>, Showkat H. Mir<sup>[b]</sup>, Vipin Mishra<sup>[b]</sup>, Thiruvancheril G. Gopakumar<sup>\*[b]</sup>, and Jayant K. Singh<sup>\*[a]</sup>

<sup>[a]</sup>Department of Chemical Engineering, Indian Institute of Technology Kanpur, Kanpur, India 208016

<sup>[b]</sup>Department of Chemistry, Indian Institute of Technology Kanpur, Kanpur, India 208016

<sup>[\*]</sup>email: gopan@iitk.ac.in; jayantks@iitk.ac.in

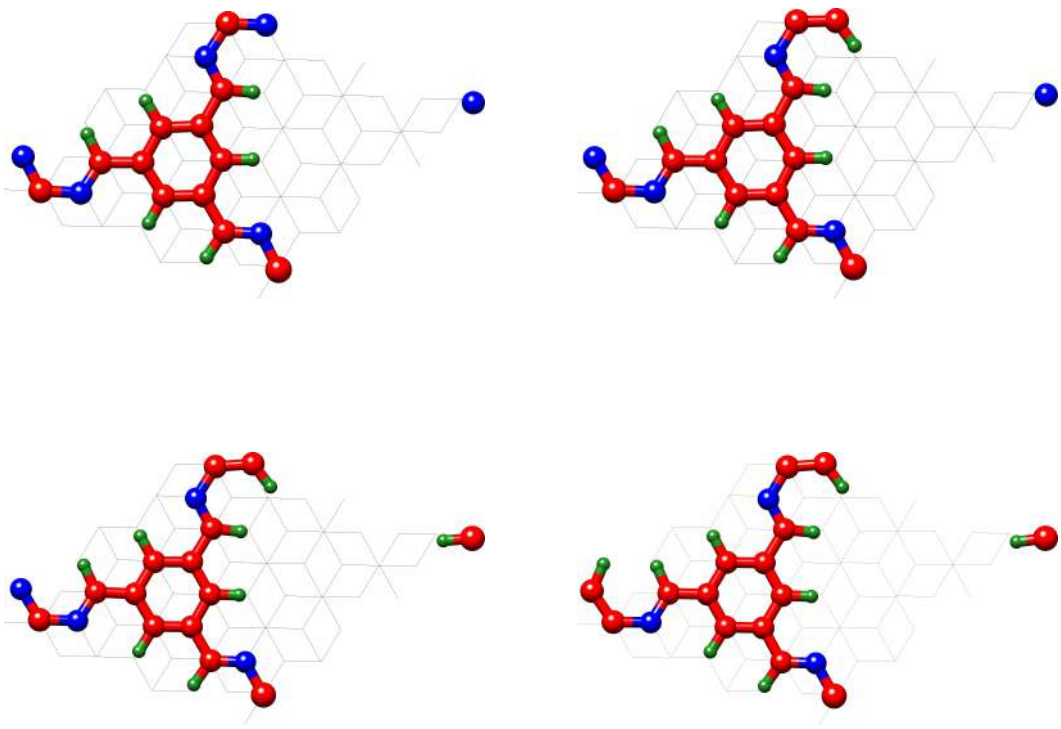

**Fig. 1** Theoretically optimized structure of different 2D COFs on HOPG. Red, blue and green represents elements like carbon, nitrogen, hydrogen, respectively in 2D COF sheet. The HOPG sheet is shown as wired network.

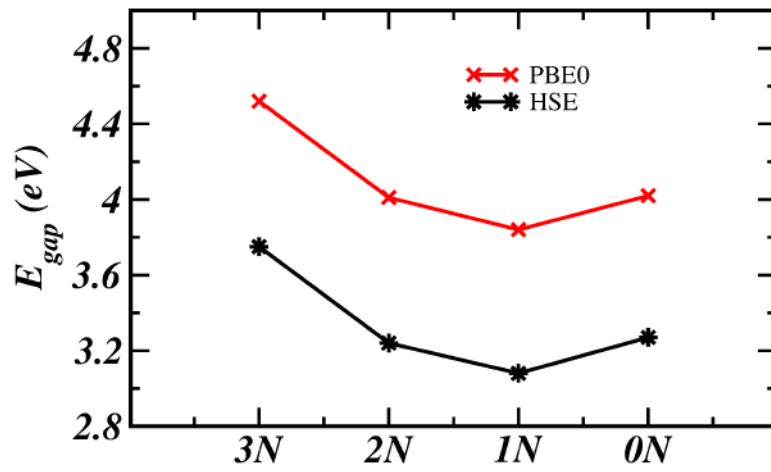

**Fig. 2** Variation in bandgap of 2D COFs with nitrogen percentage calculated using hybrid functionals.

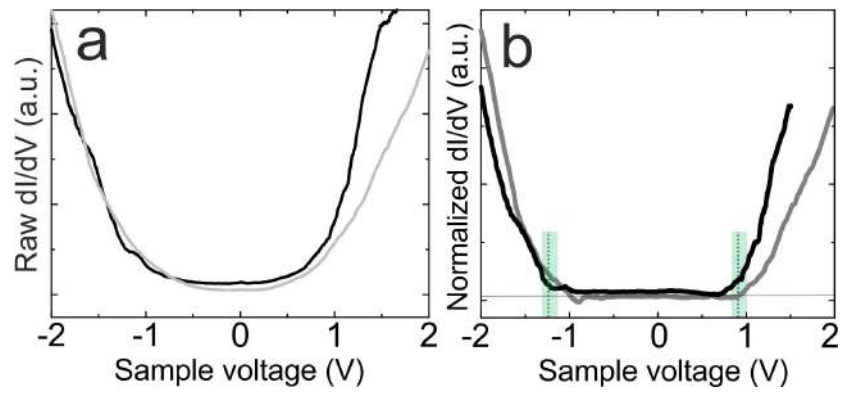

**Fig. 3** (a) The raw differential conductivity ( $dI/dV$ ) obtained on 2N COF on HOPG. (b) Normalized  $dI/dV$  obtained by subtracting graphite contribution from raw  $dI/dV$ . Dashed green lines in the normalized  $dI/dV$  show the valence band maximum and conduction band minimum.

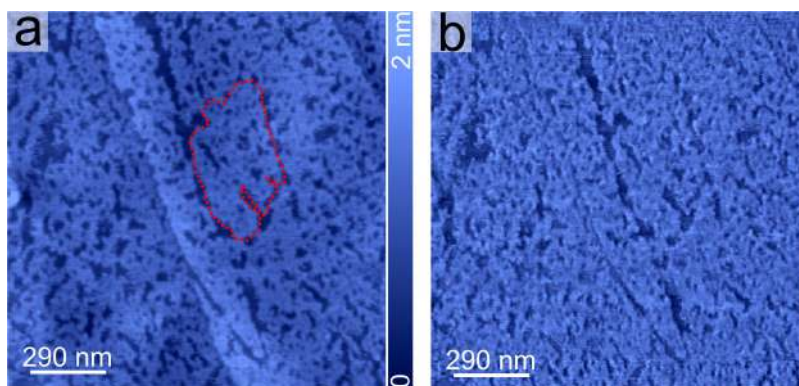

**Fig. 4** Constant force AFM topograph (a) and phase image (b) of 2N-COF prepared from TCA (Benzene-1,3,5-tricarboxaldehyde) and PTA (pyrimidine-2,4,6-triamine). The bright regions correspond to COF (marked by red dashed line) and the dark blue depicts graphite.

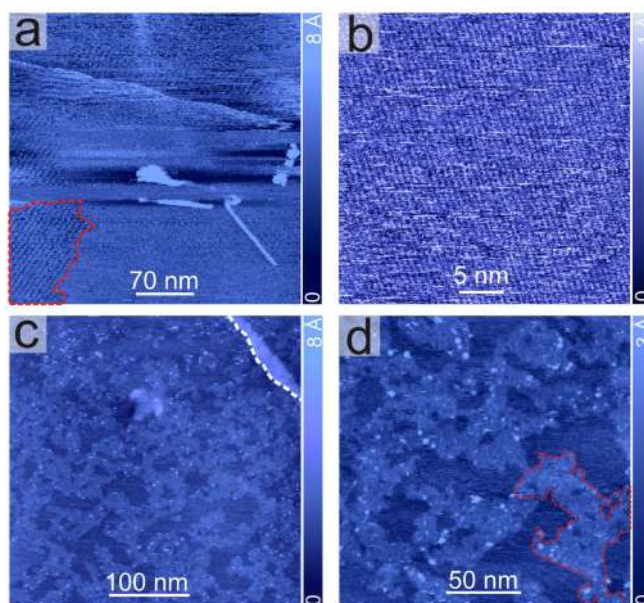

**Fig. 5** STM topographs of 2N-COF obtained from two independent regions. Typically two types of domains are observed; uniform smooth domains typically of a few hundreds of nm large (a,b) and fractal-like growth with small domains interconnected (c,d). Area marked with red dashed line in (a) shows a single domain of 2N-COF. The periodic line like feature (marked with red dashed lines) inside the domain corresponds to the molecular level contrast of COF (Figure S4b). The inter line spacing is  $\sim 6.2 \text{ \AA}$ , which corresponds to half of the unit cell parameter of the 2N-COF obtained from calculations. Bright regions in (c) represent 2D-COF (marked with red dashed lines) and dark blue regions corresponds to graphite. Further zoom of (c) is shown in (d).

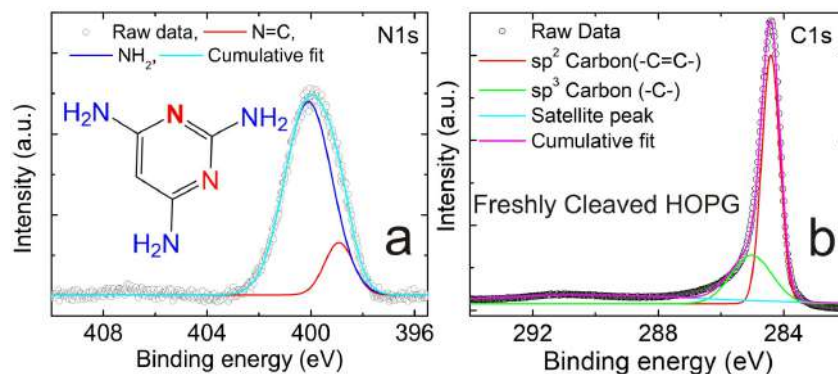

**Fig. 6** X-ray photoelectron spectroscopy (XPS) recorded on the thin film of 2,4,6- pyrimidine- triamine, PTA (a) and on freshly cleaved HOPG. N1s region of PTA shows two major resonances corresponding to -N=C- (imine) and -NH<sub>2</sub> (amine) nitrogen. Amine nitrogen is the major contribution as expected from the stoichiometry (see structure of PTA in the inset). C1s band shows major resonances corresponding to SP<sup>2</sup> carbon.

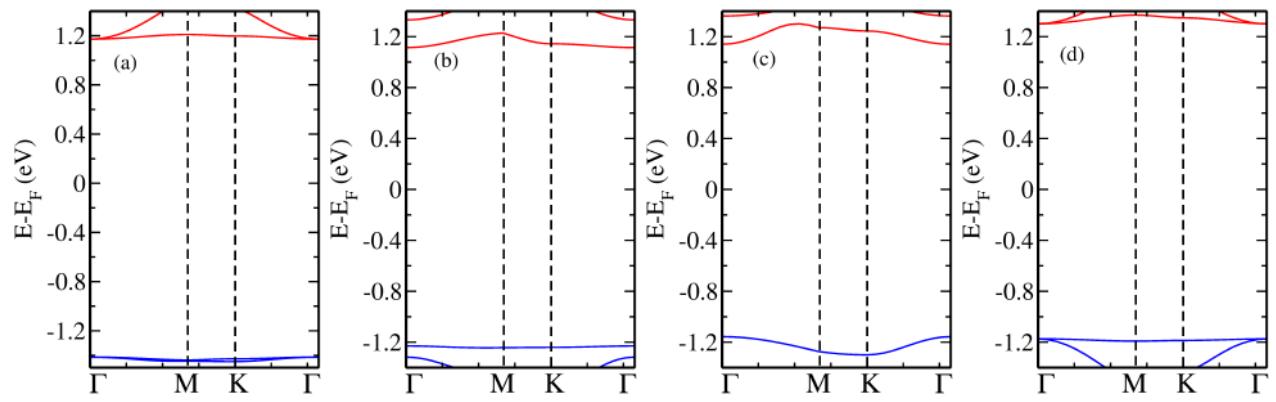

**Fig. 7** Zoom in view of the band structure of (a–d) freely-standing 2D COFs from 3N to 0N calculated using PBE+D2 functional, respectively.



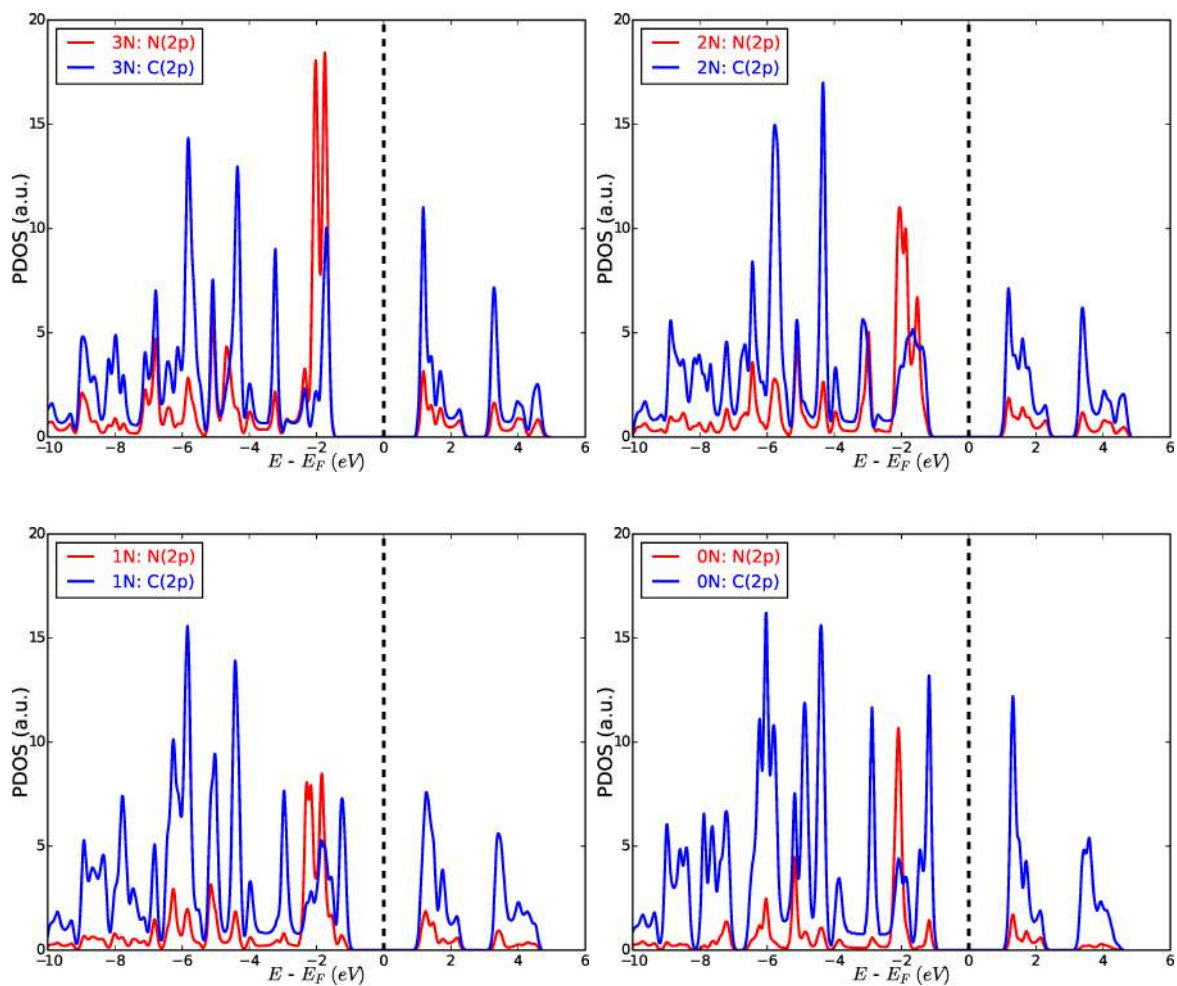

**Fig. 8** Partial density of states (PDOS) of 2D COFs from 3N to 0N calculated using BLYP+D2 functional.

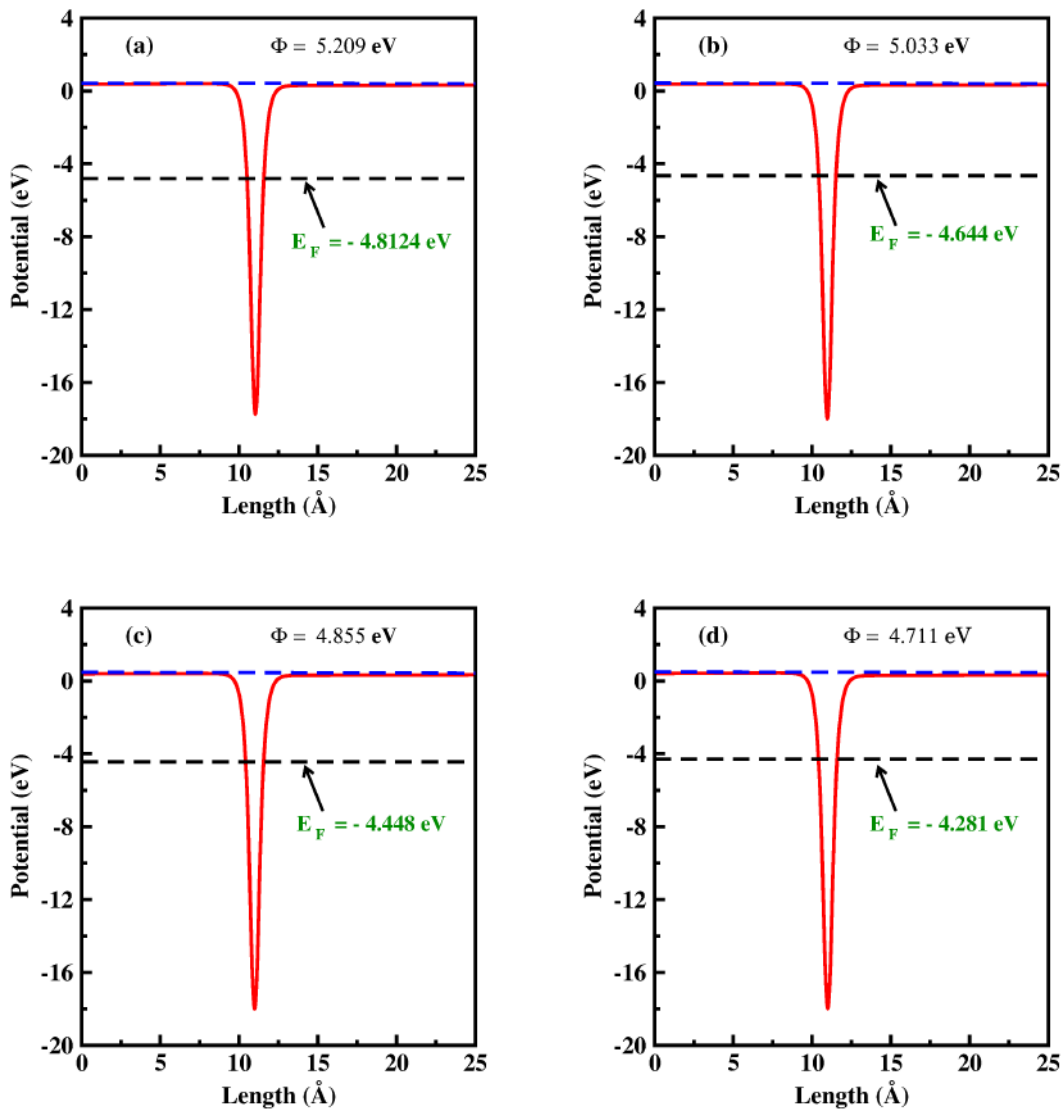

**Fig. 9** Work function of 2D-COFs from 3N to 0N calculated using PBE+D2 functional. The work function was determined by calculating the average electrostatic vacuum potential of a 2D-COF and then subtracting from it the Fermi energy. Also, in the figure, the red line represents the average electrostatic vacuum potential, black line denotes the Fermi energy, and blue line corresponds to the work function.

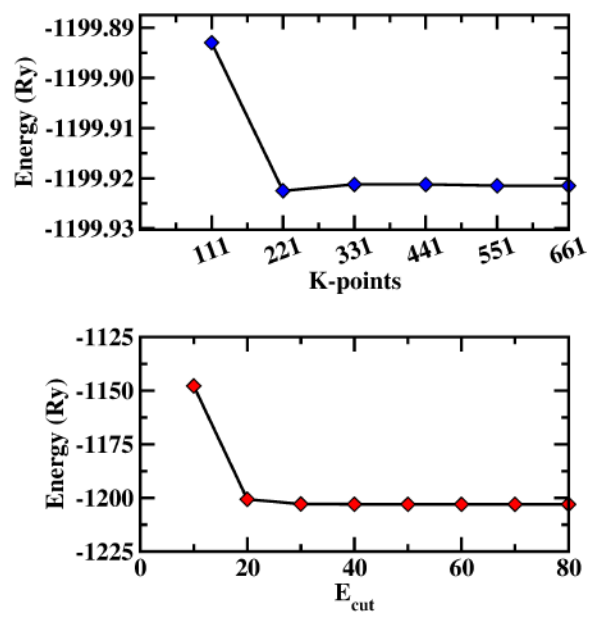

**Fig. 10** Benchmark calculation for 2D COFs to obtain the optimized Ecut and k-points.

## Optimized coordinates

### ON-COF

TITLE ON-COF

CELL

11.232485 11.233231 20.000000 90.000000 90.000000 120.009850

SYMMETRY NUMBER 1

SYMMETRY LABEL P1

ATOMS

NAME X Y Z

N 0.276712 0.025209 0.218704

N 0.811151 0.954966 0.218957

N 0.206502 0.420585 0.218632

C 0.182473 0.073526 0.218789

C 0.953602 0.049109 0.218945

C 0.336781 0.847904 0.220986

C 0.479484 0.941722 0.221122

C 0.573836 0.894972 0.221206

C 0.524924 0.752283 0.221301

C 0.383804 0.657922 0.221156

C 0.289981 0.706811 0.221052

C 0.237335 0.896178 0.220985

C 0.721573 0.994480 0.221316

C 0.335568 0.510196 0.221289

C 0.158173 0.278023 0.218752

C 0.014911 0.193558 0.218724

C 0.038231 0.990488 0.218806

C 0.241264 0.216782 0.218580

H 0.513829 0.051455 0.221144

H 0.600153 0.717675 0.221454

H 0.180139 0.631583 0.221030

H 0.748843 0.103634 0.223607

H 0.417369 0.482813 0.223922

H 0.128106 0.814319 0.223185

H 0.953622 0.244140 0.218307  
H 0.987351 0.878426 0.218478  
H 0.353215 0.277992 0.218040  
EOF

### 1N-COF

TITLE 1N-COF

CELL

11.091430 11.091471 20.000000 90.000000 90.000000 120.146927

SYMMETRY NUMBER 1

SYMMETRY LABEL P1

ATOMS

NAME X Y Z

N 0.278384 0.034401 0.219269  
N 0.809669 0.950258 0.218216  
N 0.236053 0.220177 0.219547  
N 0.201813 0.419825 0.219394  
C 0.180891 0.080532 0.219237  
C 0.950262 0.047245 0.218483  
C 0.340766 0.853038 0.220810  
C 0.482254 0.945106 0.220766  
C 0.573892 0.892968 0.220512  
C 0.523816 0.747175 0.220298  
C 0.383701 0.654828 0.220417  
C 0.292881 0.709223 0.220743  
C 0.241699 0.903451 0.221102  
C 0.720153 0.991567 0.220655  
C 0.331398 0.503540 0.220278  
C 0.151022 0.274361 0.219178  
C 0.008931 0.193312 0.218483  
C 0.038483 0.991024 0.218583  
H 0.518312 0.057443 0.220943  
H 0.596779 0.708315 0.220156  
H 0.183666 0.635808 0.220908

H 0.747119 0.102915 0.223089  
H 0.405811 0.465210 0.220914  
H 0.134315 0.819491 0.223015  
H 0.949561 0.247690 0.217886  
H 0.992888 0.877838 0.218137  
EOF

## 2N-COF

TITLE 2N-COF

CELL

10.938350 10.988780 20.000000 90.000000 90.000000 118.205750

SYMMETRY NUMBER 1

SYMMETRY LABEL P1

ATOMS

NAME X Y Z

N 0.031842 0.988928 0.219286  
N 0.284126 0.042091 0.219231  
N 0.808346 0.952835 0.219062  
N 0.239540 0.227374 0.219181  
N 0.192466 0.420008 0.219086  
C 0.184548 0.089231 0.219245  
C 0.965132 0.063015 0.219161  
C 0.325398 0.849721 0.219726  
C 0.469210 0.940252 0.219868  
C 0.564576 0.889219 0.219903  
C 0.516227 0.745243 0.219856  
C 0.373631 0.654168 0.219751  
C 0.278754 0.707444 0.219705  
C 0.225417 0.902981 0.219682  
C 0.712132 0.988977 0.220078  
C 0.323838 0.504893 0.219741  
C 0.147923 0.277085 0.219101  
C 0.004700 0.190283 0.218974  
H 0.520613 0.059122 0.219912

H 0.591864 0.706768 0.219953  
H 0.167937 0.634593 0.219671  
H 0.749751 0.105651 0.221155  
H 0.402119 0.468486 0.220305  
H 0.114084 0.827129 0.220054  
H 0.944087 0.253350 0.218708  
EOF

### 3N-COF

TITLE 3N-COF

CELL

10.973728 10.973375 20.000000 90.000000 90.000000 120.000725

SYMMETRY NUMBER 1

SYMMETRY LABEL P1

ATOMS

NAME X Y Z

N 0.047925 0.991300 0.220304  
N 0.287437 0.044131 0.220212  
N 0.004196 0.183830 0.220361  
N 0.817497 0.944322 0.220285  
N 0.240446 0.227573 0.220308  
N 0.187633 0.414260 0.220263  
C 0.186691 0.087761 0.220332  
C 0.961877 0.045058 0.220372  
C 0.339162 0.855930 0.221150  
C 0.486242 0.946874 0.221128  
C 0.577586 0.892628 0.221156  
C 0.521424 0.745512 0.221205  
C 0.375819 0.654171 0.221210  
C 0.284871 0.710329 0.221182  
C 0.241845 0.910418 0.221333  
C 0.729366 0.989930 0.221316  
C 0.321349 0.502392 0.221420  
C 0.143974 0.269872 0.220371

H 0.527403 0.060426 0.221151  
H 0.593828 0.704400 0.221291  
H 0.171335 0.637914 0.221248  
H 0.765269 0.103528 0.222354  
H 0.399054 0.466505 0.222599  
H 0.128271 0.832695 0.222475  
EOF
